# Supplementary material for: Structural evolution, optical gap and thermoelectric properties of CH3NH3SnBr3 hybrid perovskite, prepared by mechanochemistry
Source: Royal Society of Chemistry journal article supplement (doi:10.1039/d1ma00196e), 2021-01-01
Supplement: d1ma00196e1.pdf [file d1ma00196e1.pdf]

## Supporting Information

### Structural evolution, optical gap and thermoelectric properties of $\text{CH}_3\text{NH}_3\text{SnBr}_3$ hybrid perovskite, prepared by mechanochemistry.

Carlos A. López<sup>\*a,b</sup>, Carmen Abia<sup>a,c</sup>, Javier Gainza<sup>a</sup>, Paula Kayser<sup>a</sup>, N.N. Nemes<sup>a,d</sup>, O.J. Dura<sup>e</sup>, J.L. Martínez<sup>a</sup>, María T. Fernández-Díaz<sup>c</sup>, Consuelo Álvarez-Galván<sup>f</sup> and José A. Alonso<sup>\*a</sup>

<sup>a</sup> Instituto de Ciencia de Materiales de Madrid, CSIC, Cantoblanco 28049 Madrid, Spain.

<sup>b</sup> Instituto de Investigaciones en Tecnología Química (UNSL-CONICET) and Facultad de Química, Bioquímica y Farmacia, Almirante Brown 1455 (5700) San Luis, Argentine.

<sup>c</sup> Institut Laue Langevin, BP 156X, F-38042 Grenoble, France.

<sup>d</sup> Departamento de Física de Materiales, Universidad Complutense de Madrid, E-28040 Madrid, Spain.

<sup>e</sup> Departamento de Física Aplicada, Universidad de Castilla-La Mancha, Ciudad Real, E-13071, Spain

<sup>f</sup> Instituto de Catálisis y Petroleoquímica, CSIC, Cantoblanco 28049 Madrid, Spain.

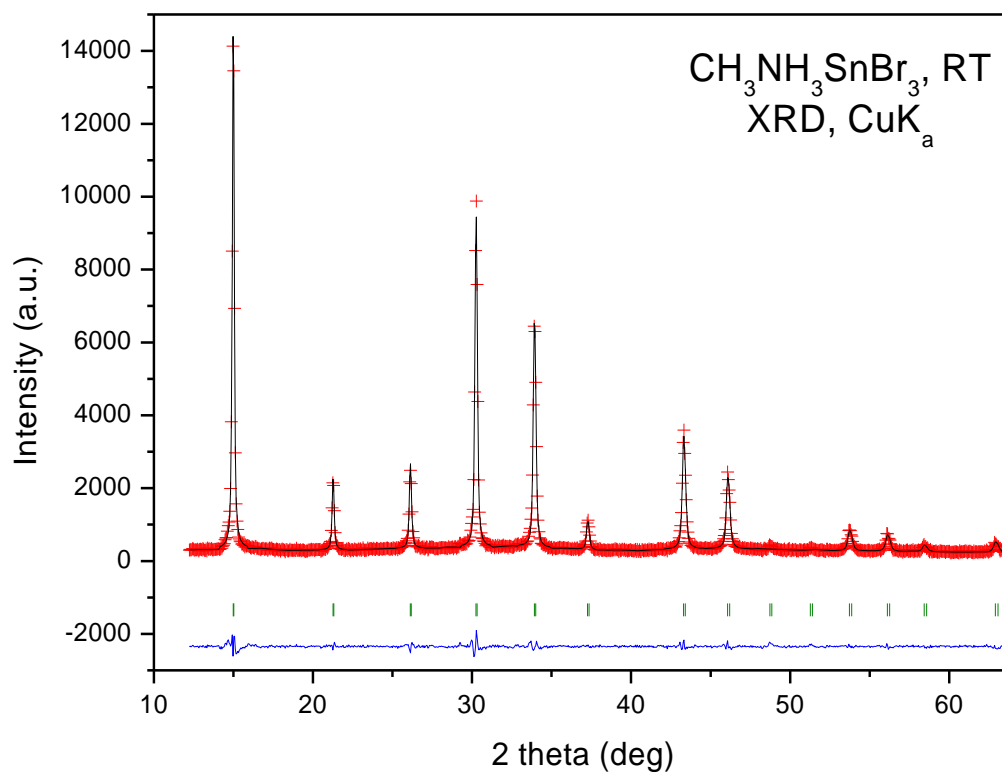

**Figure S1:** Le Bail fit of laboratory X-ray diffraction pattern of  $\text{MASnBr}_3$  prepared by mechano-chemical synthesis.

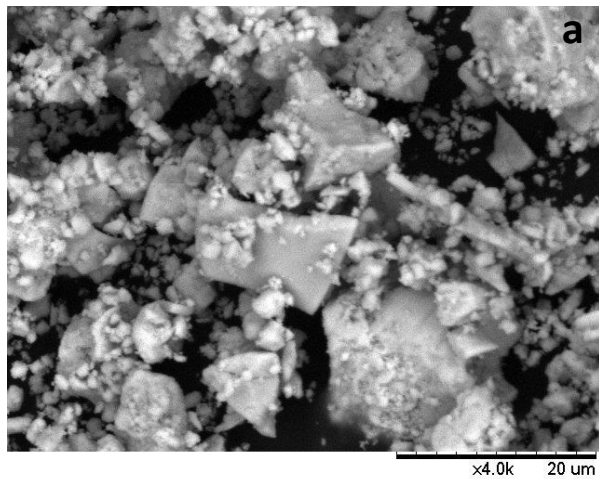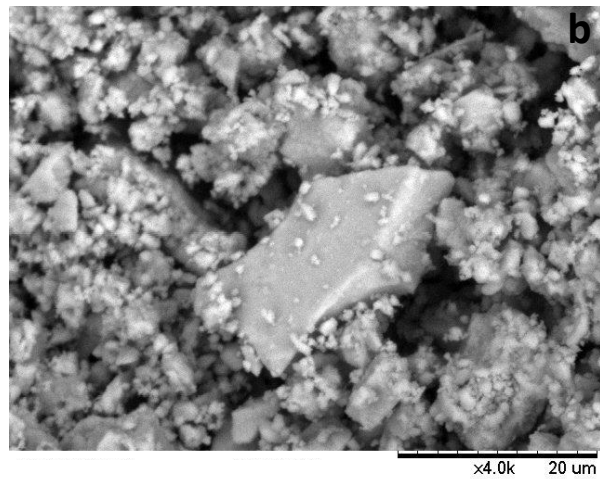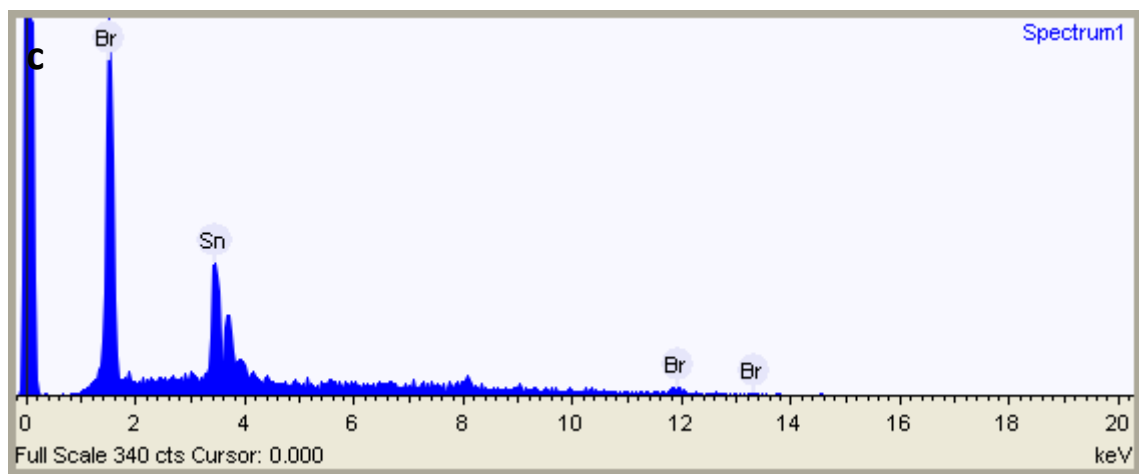

| Element | Weight % | Calc. |
|---------|----------|-------|
| Bromine | 61.6     | 66.88 |
| Tin     | 38.4     | 33.12 |

**Figure S2:** a) and b) Two selected SEM images of the as-prepared sample, and c) EDX spectrum with the determined weight (%) of Sn and Br.

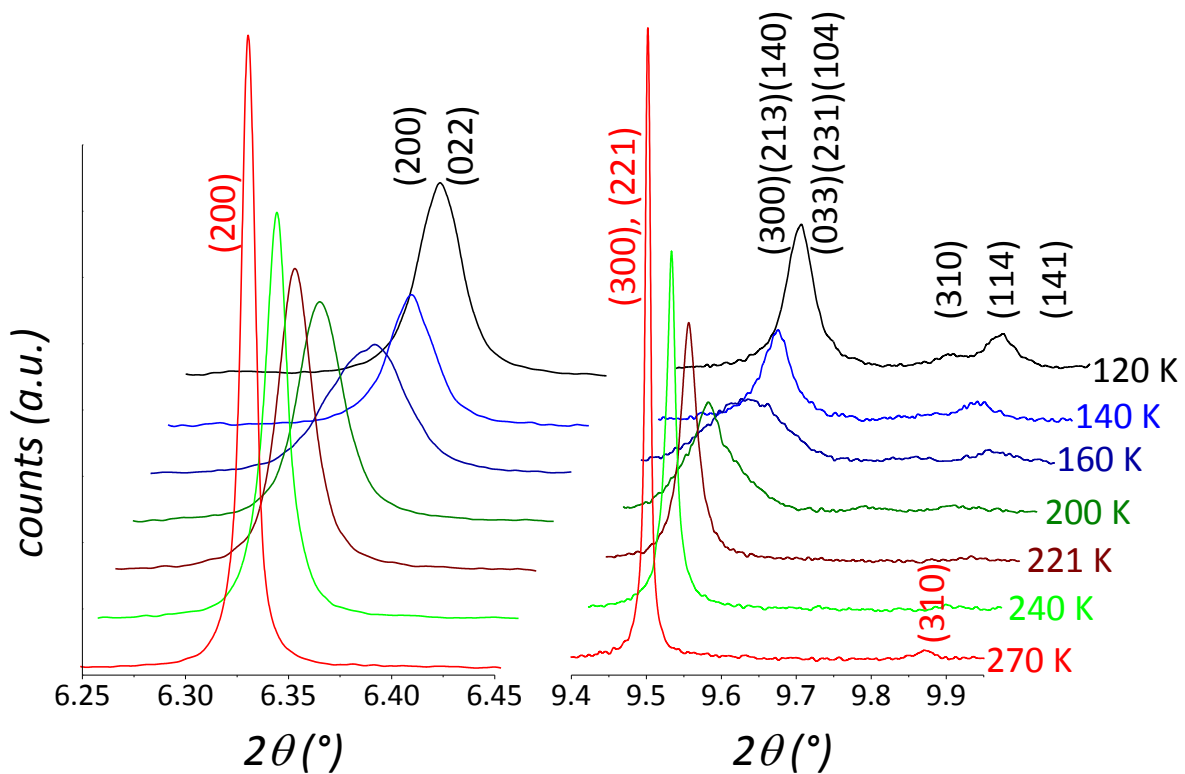

**Figure S3:** Thermal evolution of (200), (300) and (221) cubic lines from synchrotron diffraction. The Miller indices indicated in black correspond to the orthorhombic  $Pcm2_1$  space group.

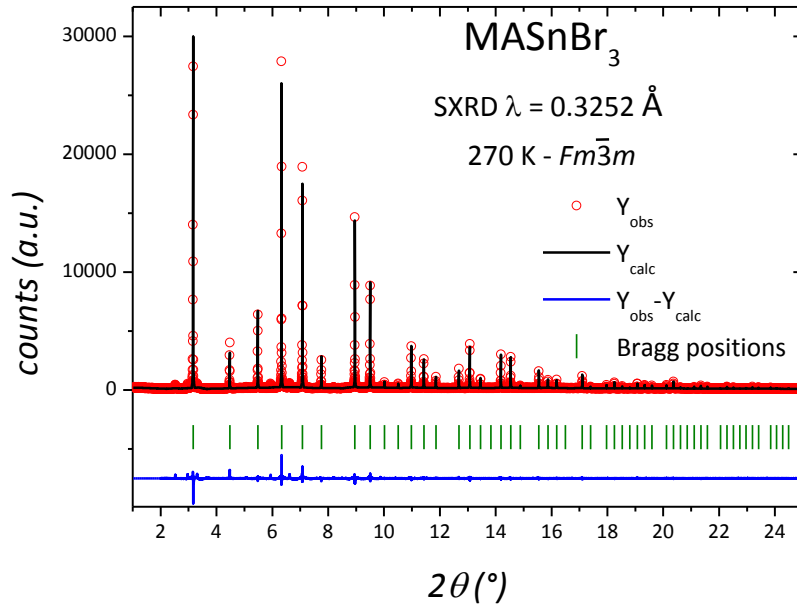

**Figure S4:** Rietveld refinement of synchrotron X-ray diffraction pattern at 270 K.

**Table S1:** Crystallographic data for MASnBr<sub>3</sub> from the SXRDL refinements at 270 K.

| System: Cubic, Space group: $Fm\bar{3}m$ , $Z = 1$ . Unit-cell parameters: $a = 5.89786(3)$ Å, and $V = 205.16(1)$ Å <sup>3</sup> . |    |          |          |          |          |          |          |
|-------------------------------------------------------------------------------------------------------------------------------------|----|----------|----------|----------|----------|----------|----------|
| Atom                                                                                                                                |    | x        | y        | z        | $U_{eq}$ | Occ      |          |
| Sn                                                                                                                                  | 1a | 0        | 0        | 0        | 0.032(1) | 1        |          |
| Br                                                                                                                                  | 3d | 0.5      | 0        | 0        | 0.104(1) | 1        |          |
| C                                                                                                                                   | 6f | 0.639(2) | 0.5      | 0.5      | 0.06(2)  | 0.166    |          |
| N                                                                                                                                   | 6f | 0.639(2) | 0.5      | 0.5      | 0.06(2)  | 0.166    |          |
| Anisotropic displacement parameters                                                                                                 |    |          |          |          |          |          |          |
|                                                                                                                                     |    | $U^{11}$ | $U^{22}$ | $U^{33}$ | $U^{12}$ | $U^{13}$ | $U^{23}$ |
| Sn                                                                                                                                  |    | 0.032(1) | 0.032(1) | 0.032(1) | 0        | 0        | 0        |
| Br                                                                                                                                  |    | 0.051(1) | 0.130(1) | 0.130(1) | 0        | 0        | 0        |
| C/N                                                                                                                                 |    | 0.03(1)  | 0.08(2)  | 0.08(2)  | 0        | 0        | 0        |
| R <sub>p</sub> : 9.57%; R <sub>wp</sub> : 12.6%; R <sub>exp</sub> : 8.23%; $\chi^2$ : 2.34; R <sub>Bragg</sub> : 5.13%              |    |          |          |          |          |          |          |

**Table S2:** Crystallographic data for  $\text{MASnBr}_3$  from the SXR D refinements at 160 K.

---

System: Cubic, Space group:  $Pcm2_1$ ,  $Z = 2$ . Unit-cell parameters:  $a = 5.8893(4) \text{ \AA}$ ,  $b = 8.3663(6) \text{ \AA}$ ,  $c = 8.2491(6) \text{ \AA}$  and  $V = 406.44(5) \text{ \AA}^3$ .

---

| Atom |      | x   | y         | z        | $U_{\text{iso}}$ | Occ |
|------|------|-----|-----------|----------|------------------|-----|
| Sn   | $2a$ | 0   | 0.7532(8) | 0        | 0.001            | 1   |
| Br1  | $2a$ | 0   | 0.577(1)  | 0.305(2) | 0.071(2)         | 1   |
| Br2  | $2a$ | 0   | 1.029(1)  | 0.197(2) | 0.071(2)         | 1   |
| Br3  | $2b$ | 0.5 | 0.767(1)  | 0.008(2) | 0.071(2)         | 1   |
| C    | $2b$ | 0.5 | 0.318(3)  | 0.106(4) | 0.001            | 1   |
| N    | $2b$ | 0.5 | 0.172(2)  | 0.015(3) | 0.001            | 1   |

---

$R_p$ : 8.23%;  $R_{wp}$ : 10.2%;  $R_{exp}$ : 8.02%;  $\chi^2$ : 1.62;  $R_{Bragg}$ : 3.98%

---

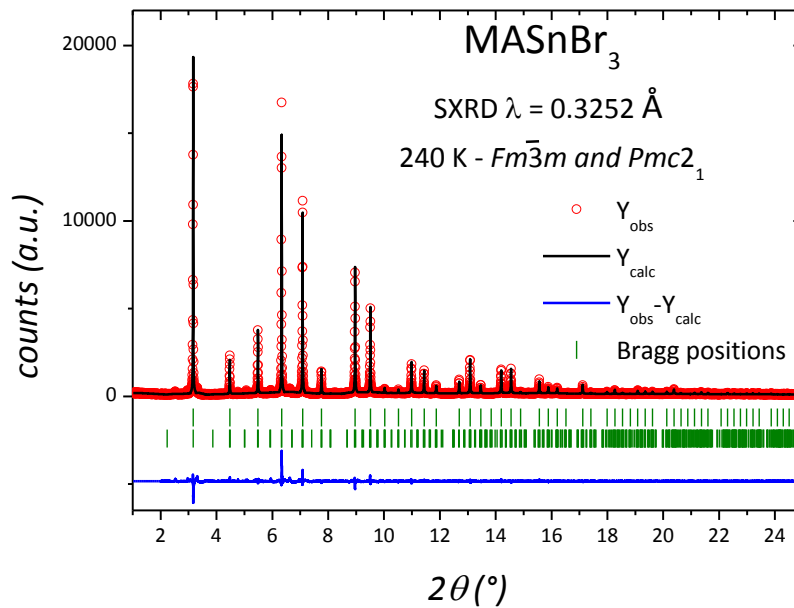

**Figure S5:** Rietveld refinement of synchrotron X-ray diffraction pattern at 240 K.

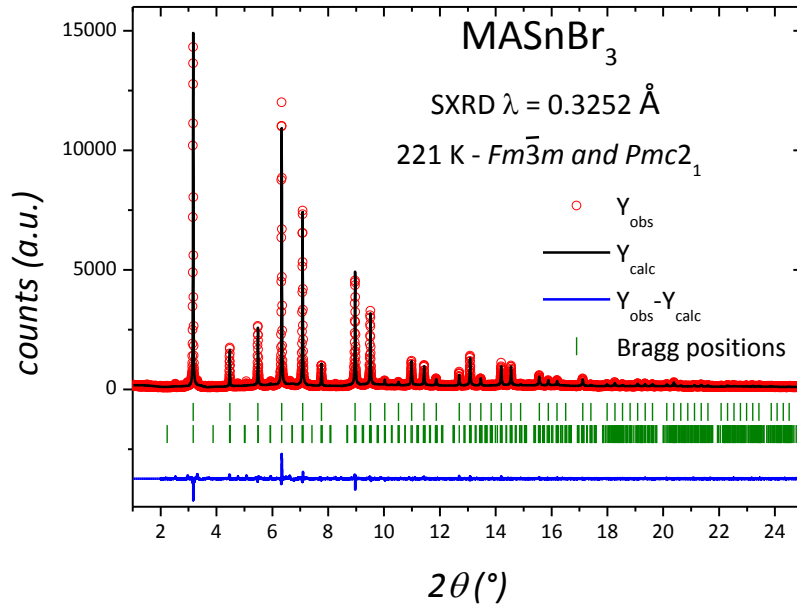

Figure S6: Rietveld refinement of synchrotron X-ray diffraction pattern at 221 K.

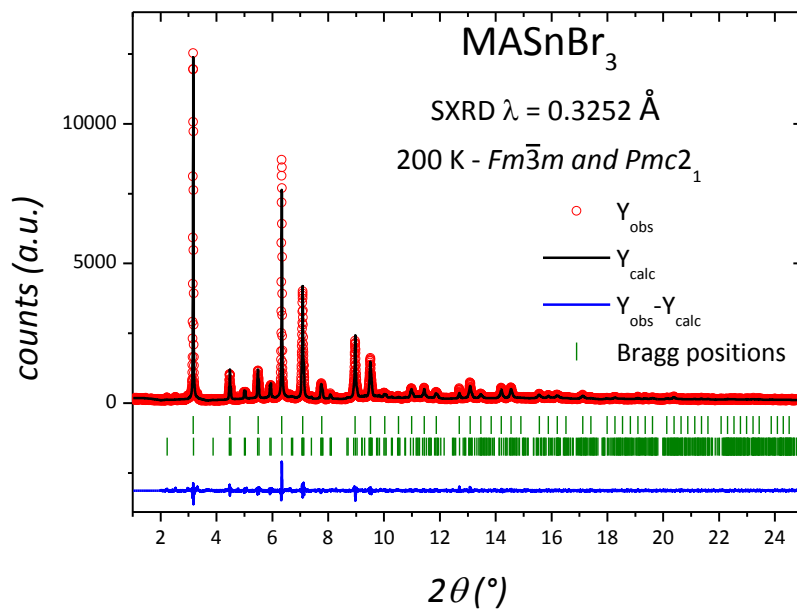

Figure S7: Rietveld refinement of synchrotron X-ray diffraction pattern at 200 K.

**Table S3:** Crystallographic data for MASnBr<sub>3</sub> from the SXR D refinements at 240 K.

| a) System: Cubic, Space group: $Fm\bar{3}m$ , $Z = 1$ . Unit-cell parameters: $a = 5.89244(7)$ Å, and $V = 204.59(1)$ Å <sup>3</sup> . Amount: 85(2) %w/w                                 |    |                 |                 |                 |                  |                 |                 |
|-------------------------------------------------------------------------------------------------------------------------------------------------------------------------------------------|----|-----------------|-----------------|-----------------|------------------|-----------------|-----------------|
| Atom                                                                                                                                                                                      |    | x               | y               | z               | U <sub>eq</sub>  | Occ             |                 |
| Sn                                                                                                                                                                                        | 1a | 0               | 0               | 0               | 0.028(1)         | 1               |                 |
| Br                                                                                                                                                                                        | 3d | 0.5             | 0               | 0               | 0.098(2)         | 1               |                 |
| C                                                                                                                                                                                         | 6f | 0.631(3)        | 0.5             | 0.5             | 0.04(1)          | 0.166           |                 |
| N                                                                                                                                                                                         | 6f | 0.631(3)        | 0.5             | 0.5             | 0.04(1)          | 0.166           |                 |
| Anisotropic displacement parameters                                                                                                                                                       |    |                 |                 |                 |                  |                 |                 |
|                                                                                                                                                                                           |    | U <sup>11</sup> | U <sup>22</sup> | U <sup>33</sup> | U <sup>12</sup>  | U <sup>13</sup> | U <sup>23</sup> |
| Sn                                                                                                                                                                                        |    | 0.028(1)        | 0.028(1)        | 0.028(1)        | 0                | 0               | 0               |
| Br                                                                                                                                                                                        |    | 0.040(2)        | 0.127(2)        | 0.127(2)        | 0                | 0               | 0               |
| C/N                                                                                                                                                                                       |    | 0.03(1)         | 0.05(1)         | 0.05(1)         | 0                | 0               | 0               |
| b) System: Cubic, Space group: $Pcm2_1$ , $Z = 2$ . Unit-cell parameters: $a = 5.9011(4)$ Å, $b = 8.3567(6)$ Å, $c = 8.3125(6)$ Å and $V = 409.92(5)$ Å <sup>3</sup> . Amount: 15(1) %w/w |    |                 |                 |                 |                  |                 |                 |
| Atom                                                                                                                                                                                      |    | x               | y               | z               | U <sub>iso</sub> | Occ             |                 |
| Sn                                                                                                                                                                                        | 2a | 0               | 0.748(4)        | 0               | 0.049(7)         | 1               |                 |
| Br1                                                                                                                                                                                       | 2a | 0               | 0.547(7)        | 0.280(3)        | 0.10(1)          | 1               |                 |
| Br2                                                                                                                                                                                       | 2a | 0               | 0.971(6)        | 0.255(3)        | 0.10(1)          | 1               |                 |
| Br3                                                                                                                                                                                       | 2b | 0.5             | 0.753(7)        | -0.041(2)       | 0.10(1)          | 1               |                 |
| C                                                                                                                                                                                         | 2b | 0.5             | 0.377(3)        | 0.09(1)         | 0.006            | 1               |                 |
| N                                                                                                                                                                                         | 2b | 0.5             | 0.206(2)        | 0.06(1)         | 0.006            | 1               |                 |
| R <sub>p</sub> : 8.28%; R <sub>wp</sub> : 10.7%; R <sub>exp</sub> : 8.10%; χ <sup>2</sup> : 1.74; R <sub>Bragg</sub> : a) 4.48%; b) 20.4%                                                 |    |                 |                 |                 |                  |                 |                 |

**Table S4:** Crystallographic data for MASnBr<sub>3</sub> from the SXR D refinements at 221 K.

| a) System: Cubic, Space group: $Fm\bar{3}m$ , $Z = 1$ . Unit-cell parameters: $a = 5.8933(1)$ Å, and $V = 204.68(1)$ Å <sup>3</sup> . Amount: 69(2) %w/w                                  |    |                 |                 |                 |                  |                 |                 |
|-------------------------------------------------------------------------------------------------------------------------------------------------------------------------------------------|----|-----------------|-----------------|-----------------|------------------|-----------------|-----------------|
| Atom                                                                                                                                                                                      |    | x               | y               | z               | U <sub>eq</sub>  | Occ             |                 |
| Sn                                                                                                                                                                                        | 1a | 0               | 0               | 0               | 0.019(1)         | 1               |                 |
| Br                                                                                                                                                                                        | 3d | 0.5             | 0               | 0               | 0.092(2)         | 1               |                 |
| C                                                                                                                                                                                         | 6f | 0.633(4)        | 0.5             | 0.5             | 0.03(2)          | 0.166           |                 |
| N                                                                                                                                                                                         | 6f | 0.633(4)        | 0.5             | 0.5             | 0.03(2)          | 0.166           |                 |
| Anisotropic displacement parameters                                                                                                                                                       |    |                 |                 |                 |                  |                 |                 |
|                                                                                                                                                                                           |    | U <sup>11</sup> | U <sup>22</sup> | U <sup>33</sup> | U <sup>12</sup>  | U <sup>13</sup> | U <sup>23</sup> |
| Sn                                                                                                                                                                                        |    | 0.019(1)        | 0.019(1)        | 0.019(1)        | 0                | 0               | 0               |
| Br                                                                                                                                                                                        |    | 0.028(2)        | 0.124(2)        | 0.124(2)        | 0                | 0               | 0               |
| C/N                                                                                                                                                                                       |    | 0.02(2)         | 0.04(2)         | 0.04(2)         | 0                | 0               | 0               |
| b) System: Cubic, Space group: $Pcm2_1$ , $Z = 2$ . Unit-cell parameters: $a = 5.8910(7)$ Å, $b = 8.3552(8)$ Å, $c = 8.3100(7)$ Å and $V = 409.02(7)$ Å <sup>3</sup> . Amount: 31(2) %w/w |    |                 |                 |                 |                  |                 |                 |
| Atom                                                                                                                                                                                      |    | x               | y               | z               | U <sub>iso</sub> | Occ             |                 |
| Sn                                                                                                                                                                                        | 2a | 0               | 0.750(4)        | 0               | 0.049(7)         | 1               |                 |
| Br1                                                                                                                                                                                       | 2a | 0               | 0.531(6)        | 0.274(4)        | 0.091(6)         | 1               |                 |
| Br2                                                                                                                                                                                       | 2a | 0               | 0.981(6)        | 0.250(5)        | 0.091(6)         | 1               |                 |
| Br3                                                                                                                                                                                       | 2b | 0.5             | 0.755(7)        | -0.027(3)       | 0.091(6)         | 1               |                 |
| C                                                                                                                                                                                         | 2b | 0.5             | 0.378(5)        | 0.088(13)       | 0.006            | 1               |                 |
| N                                                                                                                                                                                         | 2b | 0.5             | 0.215(5)        | 0.028(13)       | 0.006            | 1               |                 |
| R <sub>p</sub> : 7.41%; R <sub>wp</sub> : 9.42%; R <sub>exp</sub> : 8.04%; χ <sup>2</sup> : 1.37; R <sub>Bragg</sub> : a) 4.40%; b) 18.8%                                                 |    |                 |                 |                 |                  |                 |                 |



**Table S5:** Crystallographic data for MASnBr<sub>3</sub> from the SXR D refinements at 200 K.

| a) System: Cubic, Space group: $Fm\bar{3}m$ , $Z = 1$ . Unit-cell parameters: $a = 5.8937(3)$ Å, and $V = 204.72(2)$ Å <sup>3</sup> . Amount: 34(1) %w/w |    |          |     |     |                  |       |
|----------------------------------------------------------------------------------------------------------------------------------------------------------|----|----------|-----|-----|------------------|-------|
| Atom                                                                                                                                                     |    | x        | y   | z   | U <sub>iso</sub> | Occ   |
| Sn                                                                                                                                                       | 1a | 0        | 0   | 0   | 0.001(2)         | 1     |
| Br                                                                                                                                                       | 3d | 0.5      | 0   | 0   | 0.074(3)         | 1     |
| C                                                                                                                                                        | 6f | 0.637(5) | 0.5 | 0.5 | 0.01(2)          | 0.166 |
| N                                                                                                                                                        | 6f | 0.637(5) | 0.5 | 0.5 | 0.01(2)          | 0.166 |

  

| b) System: Cubic, Space group: $Pcm2_1$ , $Z = 2$ . Unit-cell parameters: $a = 5.8911(3)$ Å, $b = 8.3819(3)$ Å, $c = 8.2720(3)$ Å and $V = 408.46(3)$ Å <sup>3</sup> . Amount: 66(1) %w/w |    |     |           |            |                  |     |
|-------------------------------------------------------------------------------------------------------------------------------------------------------------------------------------------|----|-----|-----------|------------|------------------|-----|
| Atom                                                                                                                                                                                      |    | x   | y         | z          | U <sub>iso</sub> | Occ |
| Sn                                                                                                                                                                                        | 2a | 0   | 0.7508(9) | 0          | 0.018(2)         | 1   |
| Br1                                                                                                                                                                                       | 2a | 0   | 0.567(1)  | 0.322(2)   | 0.095(3)         | 1   |
| Br2                                                                                                                                                                                       | 2a | 0   | 1.012(1)  | 0.238(2)   | 0.095(3)         | 1   |
| Br3                                                                                                                                                                                       | 2b | 0.5 | 0.758(1)  | -0.0080(2) | 0.095(3)         | 1   |
| C                                                                                                                                                                                         | 2b | 0.5 | 0.345(5)  | 0.151(5)   | 0.006            | 1   |
| N                                                                                                                                                                                         | 2b | 0.5 | 0.224(4)  | 0.026(4)   | 0.006            | 1   |

R<sub>p</sub>: 7.63%; R<sub>wp</sub>: 9.59%; R<sub>exp</sub>: 8.03%;  $\chi^2$ : 1.43; R<sub>Bragg</sub>: a) 2.86%; b) 4.9%

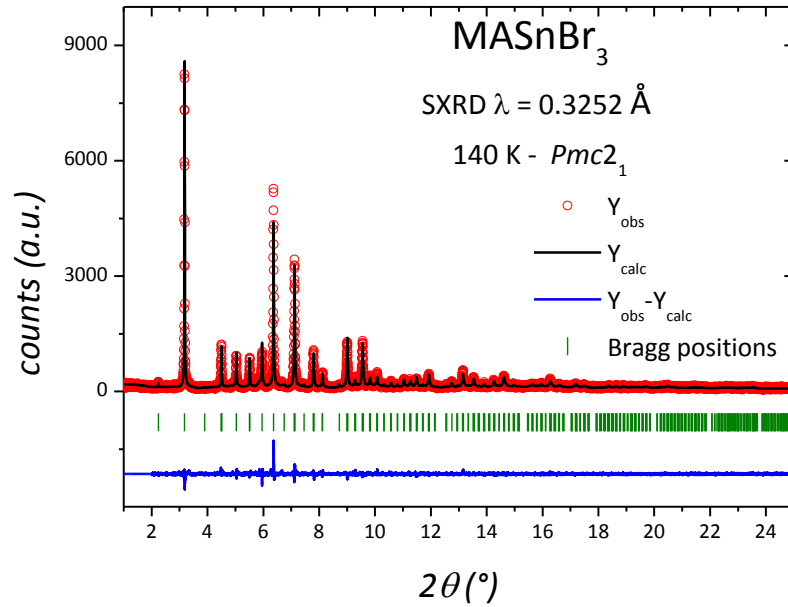

**Figure S8:** Rietveld refinement of synchrotron X-ray diffraction pattern at 140 K.

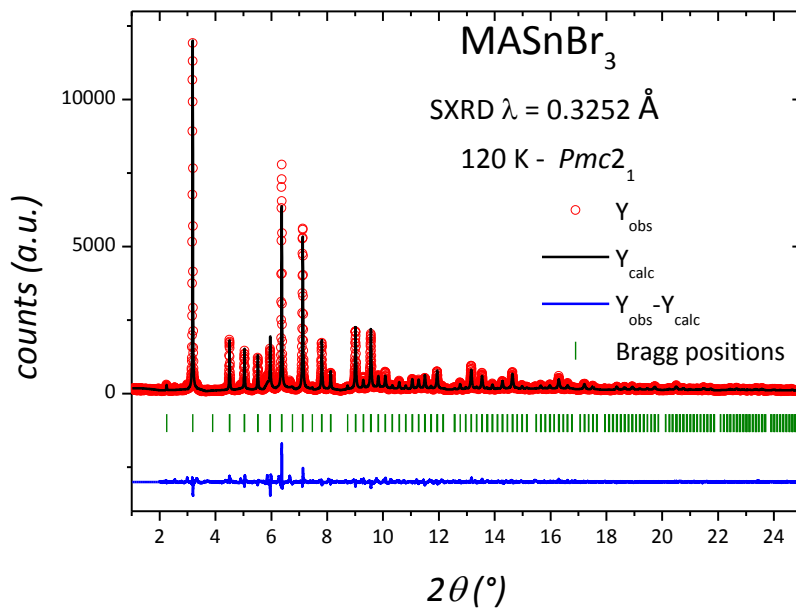

**Figure S9:** Rietveld refinement of synchrotron X-ray diffraction pattern at 120 K.

**Table S6:** Crystallographic data for MASnBr<sub>3</sub> from the SXR D refinements at 140 K.

---

System: Cubic, Space group:  $Pcm2_1$ ,  $Z = 2$ . Unit-cell parameters:  $a = 5.8644(6)$  Å,  $b = 8.3027(8)$  Å,  $c = 8.2780(8)$  Å and  $V = 403.06(7)$  Å<sup>3</sup>.

---

| Atom |      | x   | y         | z        | $U_{iso}$ | Occ |
|------|------|-----|-----------|----------|-----------|-----|
| Sn   | $2a$ | 0   | 0.7522(9) | 0        | 0.007(1)  | 1   |
| Br1  | $2a$ | 0   | 0.562(2)  | 0.294(2) | 0.075(3)  | 1   |
| Br2  | $2a$ | 0   | 1.034(2)  | 0.190(2) | 0.075(3)  | 1   |
| Br3  | $2b$ | 0.5 | 0.777(2)  | 0.046(2) | 0.075(3)  | 1   |
| C    | $2b$ | 0.5 | 0.332(5)  | 0.105(9) | 0.001     | 1   |
| N    | $2b$ | 0.5 | 0.176(2)  | 0.030(4) | 0.001     | 1   |

---

$R_p$ : 11.3%;  $R_{wp}$ : 14.5%;  $R_{exp}$ : 13.4%;  $\chi^2$ : 1.17;  $R_{Bragg}$ : 7.88%

---

**Table S7:** Crystallographic data for MASnBr<sub>3</sub> from the SXR D refinements at 120 K.

---

System: Cubic, Space group:  $Pcm2_1$ ,  $Z = 2$ . Unit-cell parameters:  $a = 5.8601(4)$  Å,  $b = 8.2904(6)$  Å,  $c = 8.2755(6)$  Å and  $V = 402.05(5)$  Å<sup>3</sup>.

---

| Atom |      | x   | y         | z        | $U_{iso}$ | Occ |
|------|------|-----|-----------|----------|-----------|-----|
| Sn   | $2a$ | 0   | 0.7541(7) | 0        | 0.007(1)  | 1   |
| Br1  | $2a$ | 0   | 0.565(2)  | 0.293(2) | 0.070(2)  | 1   |
| Br2  | $2a$ | 0   | 1.037(2)  | 0.190(2) | 0.070(2)  | 1   |
| Br3  | $2b$ | 0.5 | 0.774(2)  | 0.057(1) | 0.070(2)  | 1   |
| C    | $2b$ | 0.5 | 0.323(4)  | 0.103(7) | 0.001     | 1   |
| N    | $2b$ | 0.5 | 0.168(2)  | 0.028(3) | 0.001     | 1   |

---

$R_p$ : 9.16%;  $R_{wp}$ : 11.8%;  $R_{exp}$ : 8.02%;  $\chi^2$ : 2.15;  $R_{Bragg}$ : 6.17%

---

**Table S8:** Angles and interatomic distances of orthorhombic phases.

|                | 120 K    | 140 K    | 160 K    | 200 K    | 221 K    | 240 K    |
|----------------|----------|----------|----------|----------|----------|----------|
| Sn–Br3 (Å)     | 2.972(2) | 2.964(3) | 2.948(1) | 2.947(1) | 2.954(3) | 2.970(3) |
| Sn–Br2a (Å)    | 2.82(2)  | 2.82(2)  | 2.82(1)  | 2.94(2)  | 2.84(6)  | 2.82(5)  |
| Sn–Br1a (Å)    | 2.89(1)  | 2.90(2)  | 2.92(2)  | 3.05(1)  | 2.92(5)  | 2.87(5)  |
| Sn–Br2b (Å)    | 3.10(1)  | 3.12(2)  | 3.10(2)  | 2.95(2)  | 3.03(6)  | 3.11(5)  |
| Sn–Br1b (Å)    | 3.15(1)  | 3.12(2)  | 3.20(1)  | 3.07(1)  | 3.01(6)  | 3.07(5)  |
| Br3–Sn–Br3 (°) | 160.7(4) | 163.1(7) | 174.8(6) | 176.5(6) | 171(1)   | 166.7(8) |
| Sn–Br3–Sn (°)  | 160.7(4) | 163.1(7) | 174.8(6) | 176.5(6) | 171(1)   | 166.7(8) |
| Sn–Br2–Sn (°)  | 157.9(6) | 158.6(7) | 161.3(5) | 174.5(6) | 176(2)   | 172(2)   |
| Sn–Br1–Sn (°)  | 155.9(5) | 156.2(7) | 150.6(5) | 149.0(5) | 167(2)   | 162(2)   |
| MA angle (°)   | 19(3)    | 19(4)    | 16 (2)   | -1(3)    | 25(6)    | 35(6)    |

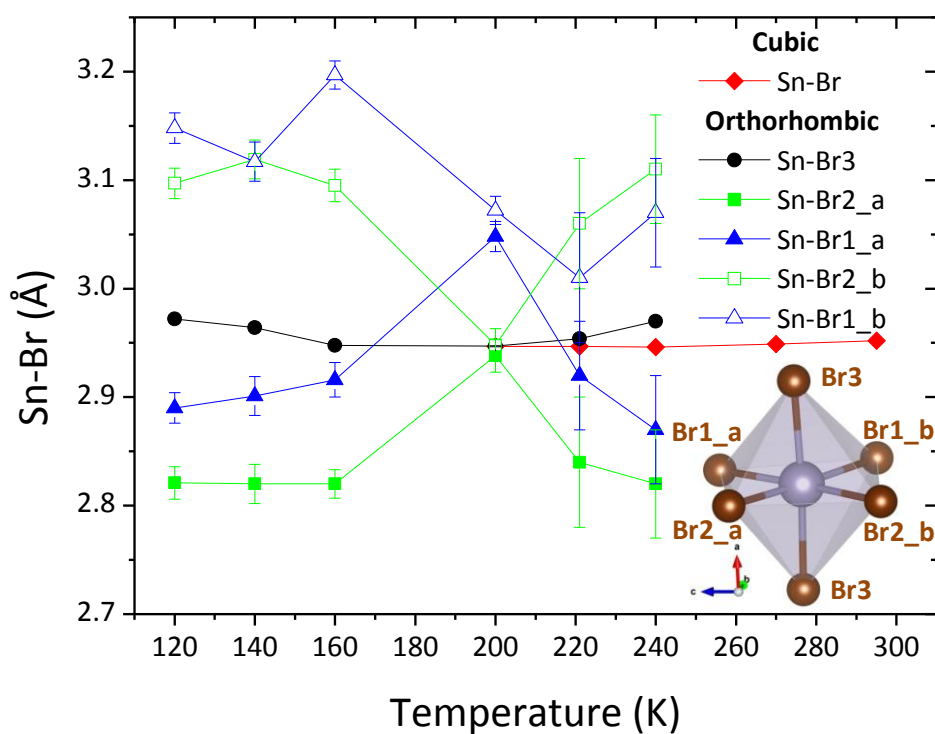**Figure S10:** Sn–Br distances at different temperatures.

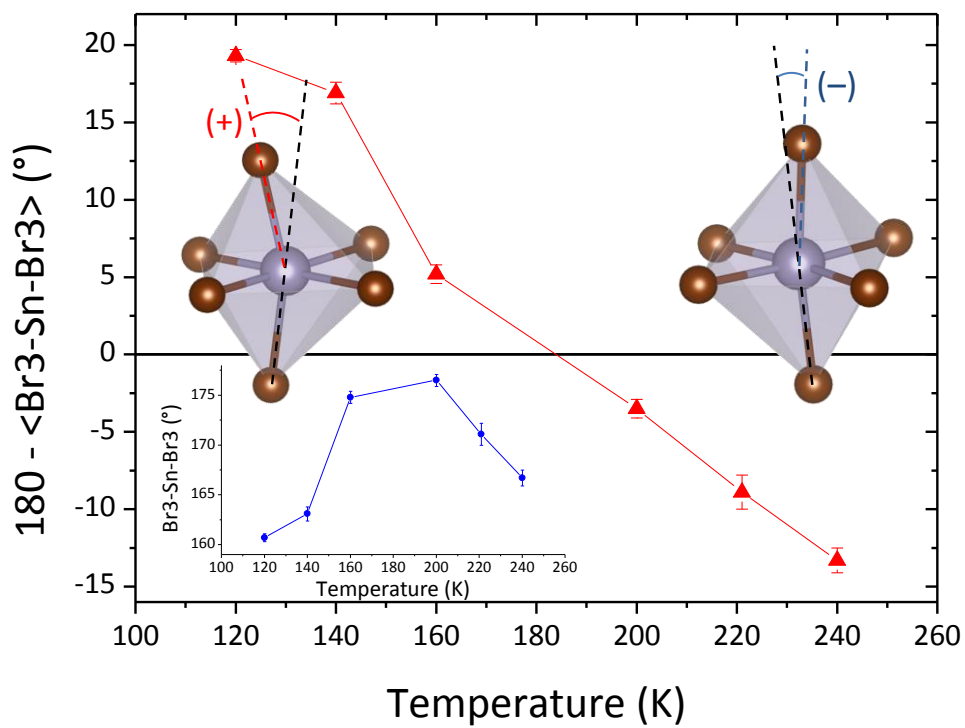

**Figure S11:** Angular deviation of Br<sub>3</sub>-Sn-Br<sub>3</sub> respect to ideal 180°. Insets: Br<sub>3</sub>-Sn-Br<sub>3</sub> angle at different temperatures and schematic view of plotted angular deviation.

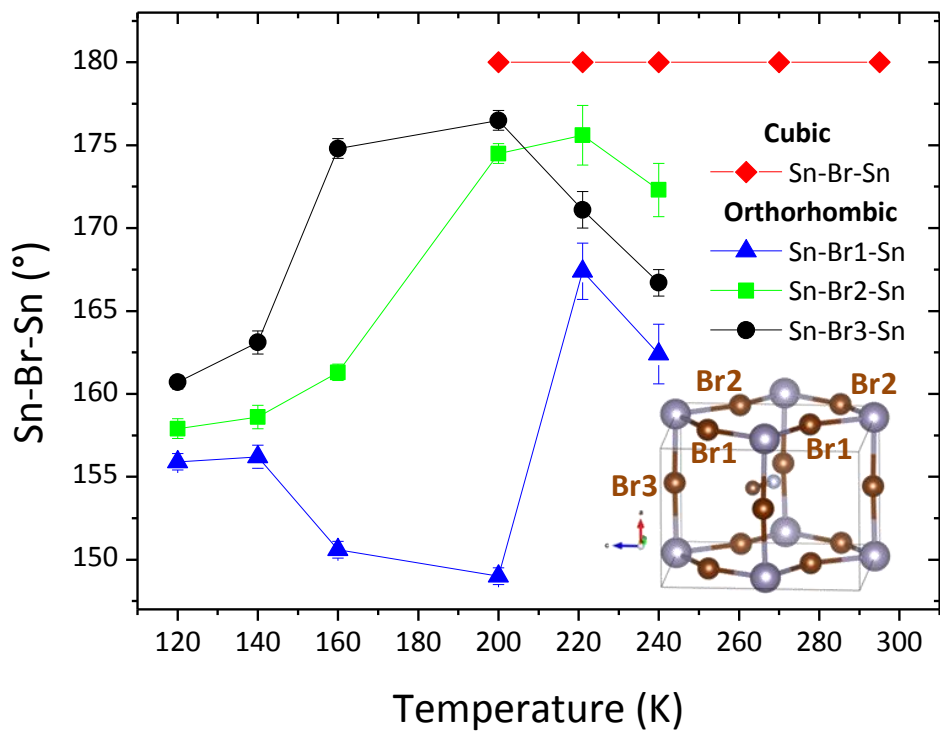

**Figure S12:** Sn–Br–Sn angles at different temperatures, describing the octahedral tilting angles.

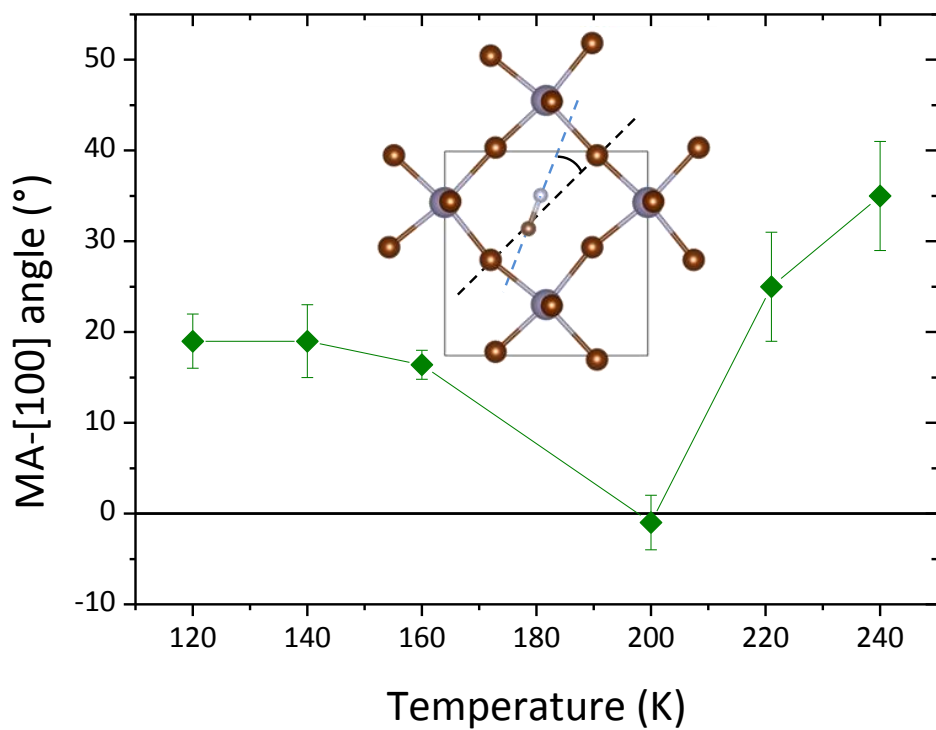

**Figure S13:** Deflection angle of MA at different temperatures. Inset shows a scheme of the plotted angle.
